# Supplementary material for: Two RNA recognition motif-containing proteins are plant mitochondrial editing factors
Source: PubMed Central journal article supplement (PMC4402546; doi:10.1093/nar/gkv245), 2015-03-23
Supplement: supp_gkv245_nar-00333-y-2015-File012.pdf [file supp_gkv245_nar-00333-y-2015-File012.pdf]

ORRM1 : KLFITGLSFYTSKTLRAAFEGFGELVEVKIIMDKISKRSKGYAFLEYITEEAAGTALKEMNGKIINGWMIIVDVAKTKP : 80  
 ORRM2 : NLFVSGLSKRITSEGLRTAFAQFGEVADAKVVTDRVSGYSKGFVRYATLEDSAKGIAGMDGKFLDGWVIFAAYARPRE : 80  
 ORRM3 : KLFIGGMAYSMDEDSLREAFTKYGEVVDTRVILDRETGRSRGFVTFISSEAASSAIQALDGRDLHGRVVKVNYANDRT : 80

RNP2 \* 20 \* 40 RNP1 \* 60 \* 80

**Supplementary Figure S1.** Alignment of the RNA Recognition Motifs (RRMs) found in ORRM1, ORRM2, and ORRM3. The RRM domain is ~80-aa long and contains two short consensus sequences, RNP1 (octamer) and RNP2 (hexamer), which are characteristic of RRM. Alignment was performed by T-Coffee version\_9.03, and displayed using GeneDoc with the conserved residue shading mode and similarity groups enabled.

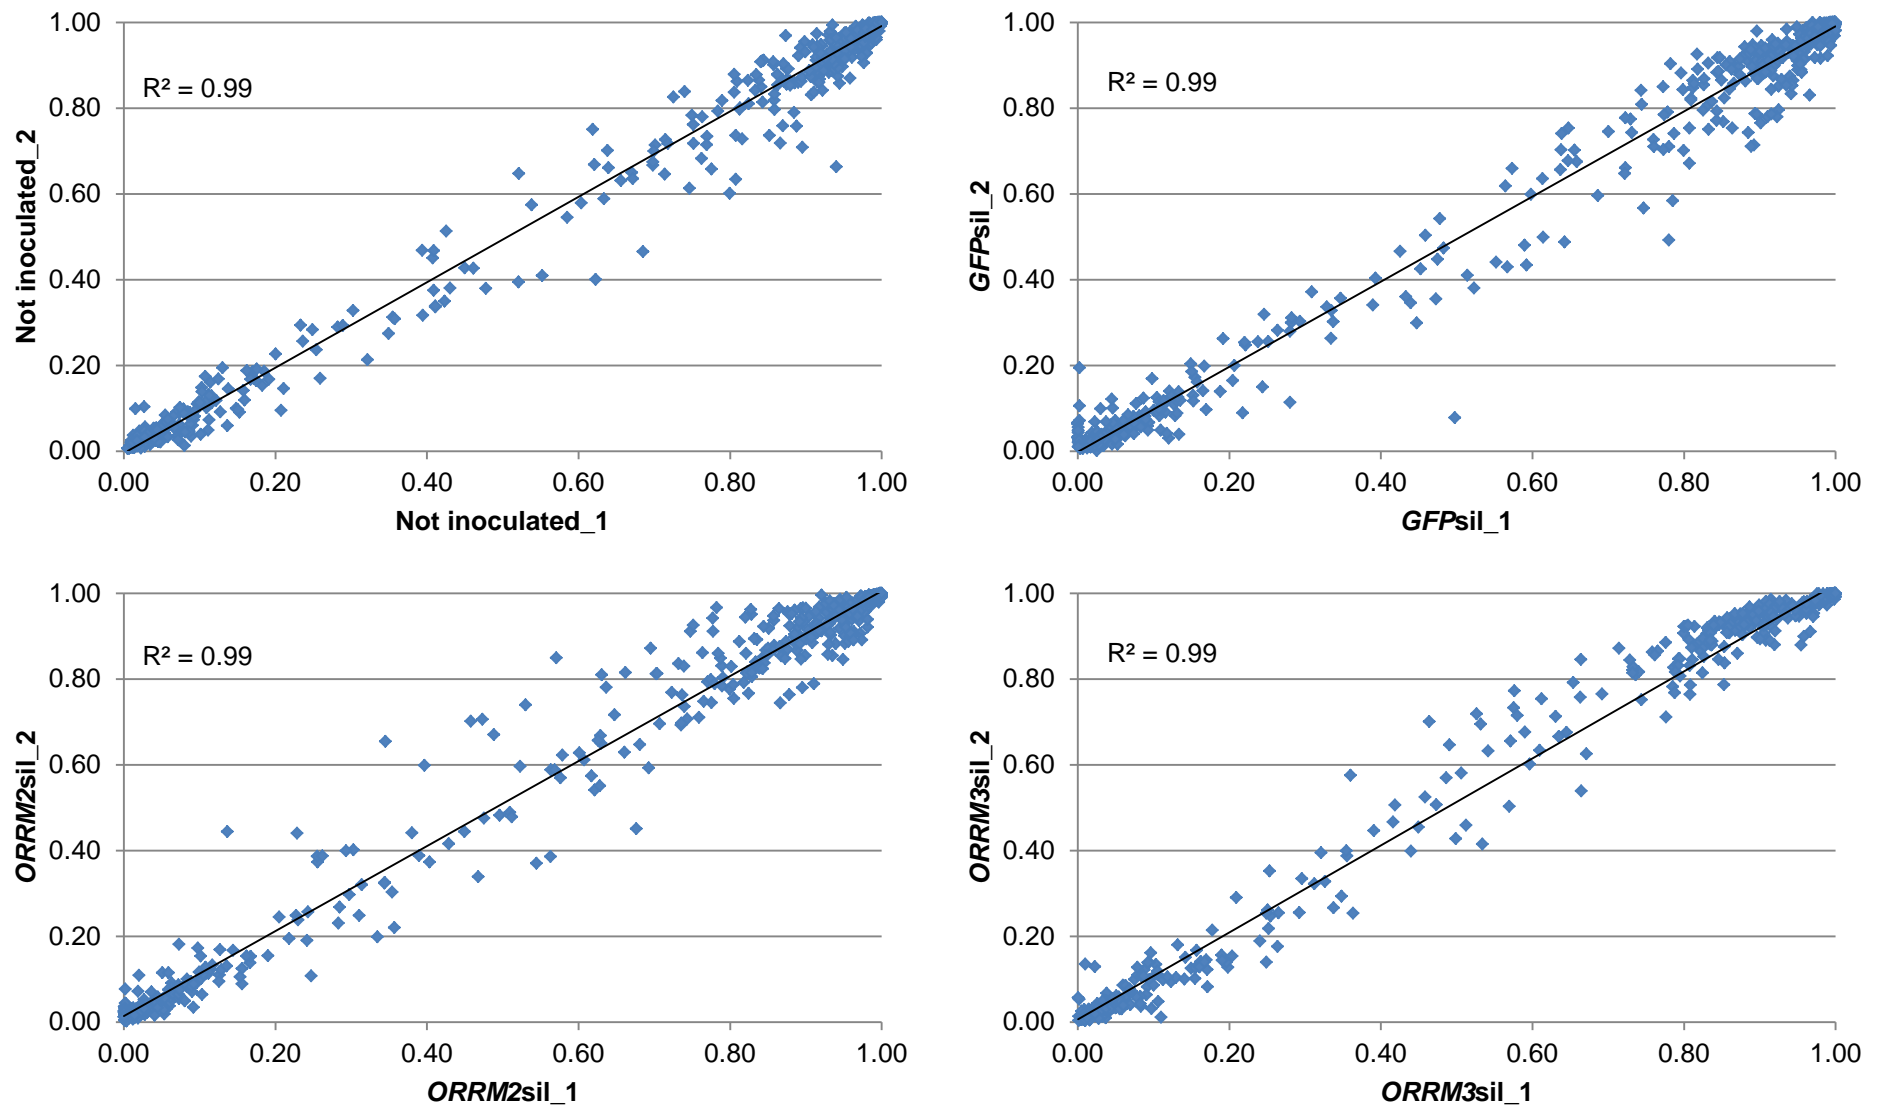

**Supplementary Figure S2.** Biological replicates exhibit a high correlation of editing extent measured by STS-PCRseq. Each graph represents a pairwise comparison of editing extent that was measured on two libraries obtained from cDNAs of two plants grown in the same conditions and harvested at the same time. Not inoculated, plants not inoculated with *Agrobacteria*. *GFP*-sil, plants inoculated with *Agrobacteria* harboring a *GFP* silencing construct. *ORRM2*-sil, plants inoculated with *Agrobacteria* harboring a *GFP* and *ORRM2* co-silencing construct. *ORRM3*-sil, plants inoculated with *Agrobacteria* harboring a *GFP* and *ORRM3* co-silencing construct. The correlation was calculated with 656 points: 618 mitochondrial sites and 38 plastid sites.

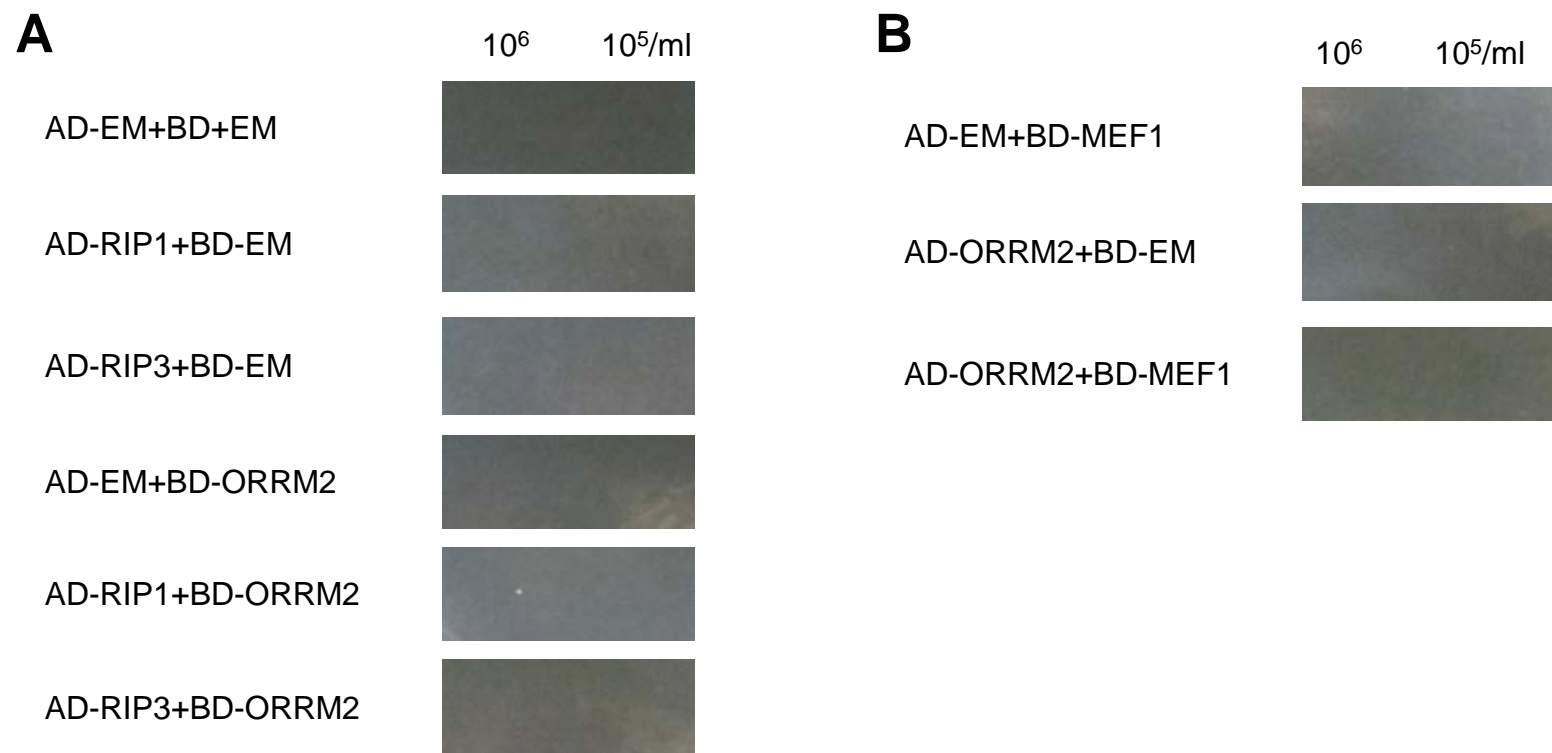

**Supplementary Figure S3.** ORRM2 does not interact with RIP1, RIP3 or MEF1. **(A)** ORRM2 does not interact with RIP1 or RIP3. **(B)** ORRM2 does not interact with MEF1 though editing at site *nad7* C963 is reduced in both *ORRM2*-silenced plants and MEF1 mutant plants. EM, yeasts transformed with a vector carrying an empty GW cassette as a negative control.

**Supplementary Table S1.** Primers used in this study

|                  |                                   |
|------------------|-----------------------------------|
| ORRM3-vigs-F     | ACACTTATGGGGAGGGTTC               |
| ORRM3-vigs-R     | CCTATTGGTCCATCTTCCATCTT           |
| ORRM2-vigs-F     | ATATGCCACTTTAGAAGATTCTGCC         |
| ORRM2-vigs-R     | AATAACACGAGACGAAGCACA             |
| SALK_038244-LP   | TGCGTGGATGGAATTCTTAAG             |
| SALK_038244-RP   | TTGGATCGTGAAACTGGTAGG             |
| ORRM3-F          | ATGGCTTTTTTTGAGTAAATTCGGGAAC      |
| ORRM3-R          | TCAAGCTCTTTTGGCAACAT              |
| ORRM3 w/o stop-R | AGCTCTTTTGGCAACATCTT              |
| ORRM3-109F       | ATGTCATCTTCTAAGCTCTTTATTGG        |
| ORRM2-F          | ATGGCGATGGCTATGAGACT              |
| ORRM2-R          | CTAGCGGTTACCATAGTAT               |
| ORRM2 w/o stop-R | GCGGTTACCATAGTATGGAGGA            |
| ORRM2-103F       | TTCTCTTTTTTGTCTCCACAAGC           |
| HA-R             | GCACTGCAGTTATCAAGCGTAGTCAGGTACGTC |
| PPE-rps4-77R     | GTCAGTTCTCTGTTCCAAACATTTCC        |
| PPE-orf240A-199  | GACTTGGAAAAAATCGTAGTTCAGATTCAAG   |
| PPE-rps3-1344R   | AAGAGATGTCTTGAGCAATCAGAGAAGC      |
| ORRM3-360R       | CTATGTTCTATCATTTGCATAGT           |
| PPE-nad6ldC-73F  | AAATGAAATAGGAACAACCGCGCTGG        |
| PBI121-F         | GGGATGACGCACAATCCCACATATCC        |
| qRT-ORRM2-F      | TTTTTCCCGAAGAAGAATCAATACGACTC     |
| qRT-ORRM2-R      | AAACCAACCGGAGCTGAAGCTACTTC        |
| qRT-ORRM3-F      | ATGTTGCCAAAAGAGCTTGAAGGAACTA      |
| qRT-ORRM3-R      | AAGATAGCAAAAAGCAGATTGTTTCTTGA     |

**Supplementary Table S2** . Sites showing a significant reduction of editing extent in *ORRM2* -silenced sites

| #Gene              | Position ATG | Editing extent |            |                |        |                       |                       | $\Delta$ ORRM2sil_1 | P ( $\chi^2_{ORRM2\ sil\ 1}$ ) | $\Delta$ ORRM2sil_2 | P ( $\chi^2_{ORRM2\ sil\ 2}$ ) |
|--------------------|--------------|----------------|------------|----------------|--------|-----------------------|-----------------------|---------------------|--------------------------------|---------------------|--------------------------------|
|                    |              | ORRM2sil_1     | ORRM2sil_2 | Not inoculated | GFPsil | (Not inoc-ORRM2sil_1) | (Not inoc-ORRM2sil_2) |                     |                                |                     |                                |
| <i>nad7</i>        | 795          | 0.26           | 0.39       | 0.84           | 0.76   | 0.58                  | 0.45                  | 0.69                | 0.E+00                         | 0.54                | 0.E+00                         |
| <i>nad6leader</i>  | -73          | 0.40           | 0.60       | 0.87           | 0.85   | 0.47                  | 0.27                  | 0.54                | 0.E+00                         | 0.31                | 0.E+00                         |
| <i>nad7</i>        | 963          | 0.57           | 0.85       | 0.99           | 0.99   | 0.42                  | 0.14                  | 0.43                | 0.E+00                         | 0.14                | 2.E-157                        |
| <i>ccmB</i>        | 80           | 0.47           | 0.71       | 0.86           | 0.78   | 0.39                  | 0.15                  | 0.45                | 5.E-303                        | 0.18                | 3.E-67                         |
| <i>nad5intron</i>  | 141966       | 0.07           | 0.18       | 0.40           | 0.36   | 0.32                  | 0.21                  | 0.82                | 0.E+00                         | 0.54                | 3.E-216                        |
| <i>rpl5</i>        | 59           | 0.46           | 0.70       | 0.78           | 0.73   | 0.32                  | 0.07                  | 0.41                | 3.E-250                        | 0.10                | 5.E-21                         |
| <i>ccmFc</i>       | 406          | 0.53           | 0.74       | 0.84           | 0.82   | 0.31                  | 0.11                  | 0.37                | 3.E-115                        | 0.12                | 1.E-28                         |
| <i>rps3</i>        | 1344         | 0.14           | 0.17       | 0.45           | 0.42   | 0.31                  | 0.29                  | 0.68                | 3.E-231                        | 0.63                | 1.E-131                        |
| <i>nad4</i>        | 1101         | 0.57           | 0.59       | 0.86           | 0.90   | 0.30                  | 0.28                  | 0.34                | 4.E-164                        | 0.32                | 2.E-125                        |
| <i>ccmC</i>        | 618          | 0.71           | 0.70       | 0.93           | 0.89   | 0.23                  | 0.24                  | 0.24                | 0.E+00                         | 0.25                | 0.E+00                         |
| <i>orf114</i>      | 327          | 0.45           | 0.44       | 0.65           | 0.66   | 0.20                  | 0.21                  | 0.31                | 3.E-131                        | 0.32                | 1.E-165                        |
| <i>nad7</i>        | 213          | 0.78           | 0.86       | 0.98           | 0.98   | 0.19                  | 0.12                  | 0.20                | 3.E-142                        | 0.12                | 7.E-87                         |
| <i>nad72intron</i> | 134309       | 0.76           | 0.86       | 0.95           | 0.94   | 0.19                  | 0.09                  | 0.20                | 0.E+00                         | 0.10                | 2.E-229                        |
| <i>ccmC</i>        | 463          | 0.79           | 0.83       | 0.95           | 0.94   | 0.16                  | 0.12                  | 0.17                | 6.E-80                         | 0.13                | 3.E-54                         |
| <i>nad3</i>        | 26           | 0.78           | 0.79       | 0.93           | 0.93   | 0.15                  | 0.14                  | 0.16                | 5.E-135                        | 0.15                | 3.E-133                        |
| <i>mttb</i>        | 59           | 0.77           | 0.79       | 0.92           | 0.92   | 0.15                  | 0.13                  | 0.16                | 9.E-71                         | 0.14                | 8.E-64                         |
| <i>ccmFc</i>       | 1215         | 0.52           | 0.60       | 0.67           | 0.70   | 0.15                  | 0.07                  | 0.22                | 2.E-46                         | 0.11                | 2.E-21                         |
| <i>rps14</i>       | 99           | 0.04           | 0.07       | 0.17           | 0.16   | 0.13                  | 0.10                  | 0.78                | 7.E-138                        | 0.58                | 9.E-98                         |
| <i>ccmC</i>        | 184          | 0.76           | 0.71       | 0.87           | 0.84   | 0.11                  | 0.16                  | 0.13                | 8.E-97                         | 0.18                | 7.E-199                        |
| <i>ccmB</i>        | 406          | 0.24           | 0.26       | 0.34           | 0.37   | 0.10                  | 0.09                  | 0.29                | 8.E-15                         | 0.25                | 6.E-13                         |
| <i>nad4</i>        | 1131         | 0.02           | 0.04       | 0.12           | 0.10   | 0.09                  | 0.07                  | 0.79                | 1.E-37                         | 0.62                | 1.E-17                         |
| <i>ccmC</i>        | 270          | 0.06           | 0.08       | 0.15           | 0.13   | 0.09                  | 0.08                  | 0.61                | 3.E-52                         | 0.50                | 1.E-39                         |
| <i>nad4</i>        | 1194         | 0.05           | 0.06       | 0.14           | 0.11   | 0.09                  | 0.08                  | 0.61                | 1.E-27                         | 0.60                | 4.E-20                         |
| <i>rpl16</i>       | 72           | 0.00           | 0.02       | 0.07           | 0.10   | 0.07                  | 0.05                  | 0.96                | 2.E-47                         | 0.71                | 1.E-51                         |
| <i>rps7leader</i>  | -217         | 0.11           | 0.13       | 0.18           | 0.25   | 0.07                  | 0.05                  | 0.40                | 2.E-19                         | 0.29                | 2.E-13                         |
| <i>cob</i>         | 114          | 0.01           | 0.02       | 0.07           | 0.07   | 0.06                  | 0.05                  | 0.83                | 1.E-40                         | 0.69                | 3.E-46                         |
| <i>ccmFc</i>       | 315          | 0.00           | 0.01       | 0.05           | 0.03   | 0.05                  | 0.04                  | 0.96                | 1.E-16                         | 0.75                | 7.E-22                         |
| <i>rps4</i>        | 711          | 0.03           | 0.03       | 0.07           | 0.08   | 0.04                  | 0.04                  | 0.60                | 4.E-15                         | 0.54                | 1.E-15                         |
| <i>nad72intron</i> | 134282       | 0.01           | 0.02       | 0.05           | 0.07   | 0.04                  | 0.03                  | 0.77                | 6.E-74                         | 0.61                | 4.E-45                         |
| <i>rps12</i>       | 328          | 0.00           | 0.01       | 0.04           | 0.04   | 0.04                  | 0.03                  | 0.97                | 6.E-70                         | 0.70                | 3.E-47                         |
| <i>nad5</i>        | 1494         | 0.01           | 0.01       | 0.04           | 0.04   | 0.03                  | 0.02                  | 0.83                | 6.E-12                         | 0.64                | 8.E-11                         |
| <i>rps3</i>        | 270          | 0.01           | 0.01       | 0.03           | 0.05   | 0.03                  | 0.02                  | 0.78                | 3.E-21                         | 0.61                | 4.E-08                         |
| <i>nad9</i>        | 517          | 0.03           | 0.02       | 0.05           | 0.05   | 0.02                  | 0.03                  | 0.45                | 5.E-12                         | 0.53                | 3.E-22                         |
| <i>nad5</i>        | 1933         | 0.01           | 0.01       | 0.03           | 0.02   | 0.02                  | 0.02                  | 0.66                | 3.E-09                         | 0.58                | 1.E-10                         |
| <i>nad2</i>        | 336          | 0.01           | 0.01       | 0.03           | 0.06   | 0.02                  | 0.02                  | 0.60                | 1.E-06                         | 0.59                | 1.E-11                         |

Sites have been sorted according to a decreasing editing extent (Not inoc-ORRM2 sil\_1).  $\Delta$ ORRM2 sil\_n: (Not inoc-ORRM2 sil\_n)/Not inoc. Sites which are also reduced in *ORRM3*-silenced tissues are shown in a blue background.

**Supplementary Table S3** . Sites showing a significant reduction of editing extent in *ORRM3*-silenced sites

| #Gene            | Position ATG | Editing extent |            |                |        |                       |                       | $\Delta$ ORRM3sil_1 | P ( $\chi^2_{ORRM3\ sil_1}$ ) | $\Delta$ ORRM3sil_2 | P ( $\chi^2_{ORRM3\ sil_2}$ ) |
|------------------|--------------|----------------|------------|----------------|--------|-----------------------|-----------------------|---------------------|-------------------------------|---------------------|-------------------------------|
|                  |              | ORRM3sil_1     | ORRM3sil_2 | Not inoculated | GFPsil | (Not inoc-ORRM3sil_1) | (Not inoc-ORRM3sil_2) |                     |                               |                     |                               |
| <i>ccmC</i>      | 618          | 0.46           | 0.70       | 0.93           | 0.89   | 0.47                  | 0.23                  | 0.50                | 0.E+00                        | 0.25                | 1.E-283                       |
| <i>rps3</i>      | 1344         | 0.08           | 0.13       | 0.45           | 0.42   | 0.37                  | 0.33                  | 0.83                | 2.E-195                       | 0.72                | 7.E-139                       |
| <i>nad6lead</i>  | -73          | 0.54           | 0.63       | 0.87           | 0.85   | 0.33                  | 0.24                  | 0.38                | 0.E+00                        | 0.27                | 4.E-259                       |
| <i>nad5intro</i> | 141966       | 0.10           | 0.16       | 0.40           | 0.36   | 0.30                  | 0.23                  | 0.76                | 0.E+00                        | 0.59                | 8.E-152                       |
| <i>orf114</i>    | 327          | 0.36           | 0.58       | 0.65           | 0.66   | 0.29                  | 0.07                  | 0.45                | 0.E+00                        | 0.11                | 2.E-22                        |
| <i>ccmC</i>      | 463          | 0.66           | 0.85       | 0.95           | 0.94   | 0.29                  | 0.10                  | 0.30                | 5.E-182                       | 0.11                | 3.E-37                        |
| <i>orf240A</i>   | 199          | 0.21           | 0.29       | 0.43           | 0.48   | 0.22                  | 0.14                  | 0.51                | 9.E-121                       | 0.32                | 3.E-38                        |
| <i>ccmC</i>      | 252          | 0.25           | 0.35       | 0.45           | 0.41   | 0.20                  | 0.10                  | 0.44                | 7.E-97                        | 0.21                | 2.E-19                        |
| <i>rps4</i>      | 77           | 0.59           | 0.68       | 0.78           | 0.79   | 0.19                  | 0.10                  | 0.24                | 2.E-188                       | 0.13                | 2.E-59                        |
| <i>ccmC</i>      | 381          | 0.18           | 0.21       | 0.32           | 0.29   | 0.14                  | 0.11                  | 0.45                | 3.E-46                        | 0.34                | 6.E-21                        |
| <i>ccmC</i>      | 270          | 0.04           | 0.05       | 0.15           | 0.13   | 0.12                  | 0.10                  | 0.77                | 9.E-85                        | 0.67                | 9.E-47                        |
| <i>nad5</i>      | 609          | 0.79           | 0.77       | 0.87           | 0.90   | 0.08                  | 0.10                  | 0.10                | 1.E-16                        | 0.12                | 3.E-22                        |
| <i>nad4</i>      | 1131         | 0.04           | 0.05       | 0.12           | 0.10   | 0.08                  | 0.07                  | 0.69                | 5.E-30                        | 0.60                | 3.E-24                        |
| <i>nad7</i>      | 1050         | 0.09           | 0.14       | 0.17           | 0.18   | 0.08                  | 0.03                  | 0.45                | 5.E-40                        | 0.19                | 6.E-07                        |
| <i>nad4</i>      | 1194         | 0.06           | 0.06       | 0.14           | 0.11   | 0.08                  | 0.08                  | 0.54                | 1.E-22                        | 0.56                | 3.E-26                        |
| <i>nad4</i>      | 636          | 0.03           | 0.04       | 0.10           | 0.10   | 0.07                  | 0.07                  | 0.71                | 5.E-32                        | 0.64                | 1.E-29                        |
| <i>nad5</i>      | 1665         | 0.05           | 0.05       | 0.12           | 0.11   | 0.07                  | 0.07                  | 0.58                | 5.E-28                        | 0.57                | 5.E-24                        |
| <i>atp1</i>      | 1110         | 0.02           | 0.02       | 0.09           | 0.06   | 0.06                  | 0.06                  | 0.74                | 4.E-15                        | 0.71                | 6.E-29                        |
| <i>ccmB</i>      | 75           | 0.09           | 0.06       | 0.15           | 0.13   | 0.06                  | 0.08                  | 0.39                | 9.E-17                        | 0.57                | 5.E-39                        |
| <i>nad1</i>      | 40           | 0.13           | 0.10       | 0.19           | 0.18   | 0.06                  | 0.08                  | 0.30                | 2.E-18                        | 0.44                | 4.E-33                        |
| <i>nad7</i>      | 789          | 0.19           | 0.14       | 0.25           | 0.27   | 0.06                  | 0.10                  | 0.23                | 1.E-07                        | 0.41                | 1.E-21                        |
| <i>mttb</i>      | 422          | 0.02           | 0.03       | 0.07           | 0.05   | 0.05                  | 0.04                  | 0.76                | 3.E-30                        | 0.64                | 3.E-15                        |
| <i>nad5</i>      | 1929         | 0.03           | 0.04       | 0.08           | 0.08   | 0.05                  | 0.05                  | 0.59                | 6.E-33                        | 0.57                | 2.E-26                        |
| <i>cob</i>       | 114          | 0.02           | 0.03       | 0.07           | 0.07   | 0.05                  | 0.04                  | 0.71                | 6.E-35                        | 0.62                | 5.E-38                        |
| <i>cox2</i>      | 250          | 0.04           | 0.03       | 0.08           | 0.09   | 0.04                  | 0.05                  | 0.55                | 1.E-16                        | 0.61                | 1.E-25                        |
| <i>ccmB</i>      | 78           | 0.01           | 0.03       | 0.05           | 0.05   | 0.04                  | 0.02                  | 0.72                | 2.E-23                        | 0.44                | 3.E-08                        |
| <i>mttb</i>      | 673          | 0.01           | 0.02       | 0.05           | 0.04   | 0.03                  | 0.03                  | 0.69                | 7.E-15                        | 0.58                | 5.E-08                        |
| <i>mttb</i>      | 82           | 0.00           | 0.00       | 0.03           | 0.02   | 0.03                  | 0.03                  | 0.94                | 6.E-72                        | 0.87                | 2.E-37                        |
| <i>rps12</i>     | 328          | 0.01           | 0.01       | 0.04           | 0.04   | 0.03                  | 0.03                  | 0.75                | 2.E-53                        | 0.85                | 4.E-58                        |
| <i>nad9</i>      | 517          | 0.03           | 0.02       | 0.05           | 0.05   | 0.02                  | 0.03                  | 0.46                | 1.E-15                        | 0.67                | 7.E-36                        |
| <i>nad4</i>      | 261          | 0.01           | 0.01       | 0.03           | 0.04   | 0.02                  | 0.02                  | 0.74                | 8.E-13                        | 0.51                | 1.E-06                        |
| <i>nad5</i>      | 1933         | 0.01           | 0.01       | 0.03           | 0.02   | 0.02                  | 0.02                  | 0.61                | 6.E-12                        | 0.67                | 5.E-13                        |

Sites have been sorted according to a decreasing editing extent (Not inoc-ORRM3sil\_1).  $\Delta$ ORRM3sil\_n: (Not inoc-ORRM3sil\_n)/Not inoc. Sites which are also reduced in *ORRM2*-silenced tissues are shown in a blue background.

Supplementary Table S4 . Plastid editing extent in *ORRM2* -silenced sites

| #Gene        | Position ATG | Editing extent     |                    |                |        |                                |                                | $\Delta$ <i>ORRM2</i> sil_1 | P ( $\chi^2$ <i>ORRM2</i> sil_1) | $\Delta$ <i>ORRM2</i> sil_2 | P ( $\chi^2$ <i>ORRM2</i> sil_2) |
|--------------|--------------|--------------------|--------------------|----------------|--------|--------------------------------|--------------------------------|-----------------------------|----------------------------------|-----------------------------|----------------------------------|
|              |              | <i>ORRM2</i> sil_1 | <i>ORRM2</i> sil_2 | Not inoculated | GFPsil | (Not inoc- <i>ORRM2</i> sil_1) | (Not inoc- <i>ORRM2</i> sil_2) |                             |                                  |                             |                                  |
| <i>accD</i>  | 794          | 1.00               | 1.00               | 0.99           | 1.00   | -0.01                          | -0.01                          | -0.01                       | 8.E-02                           | -0.01                       | 9.E-04                           |
| <i>accD</i>  | 1568         | 0.84               | 0.85               | 0.80           | 0.82   | -0.05                          | -0.05                          | -0.06                       | 2.E-03                           | -0.07                       | 4.E-07                           |
| <i>atpF</i>  | 92           | 0.99               | 0.99               | 0.99           | 0.99   | 0.00                           | 0.00                           | 0.00                        | 3.E-01                           | 0.00                        | 4.E-03                           |
| <i>clpP</i>  | 559          | 0.97               | 0.99               | 0.97           | 0.97   | -0.01                          | -0.02                          | -0.01                       | 7.E-02                           | -0.02                       | 1.E-13                           |
| <i>matK</i>  | 640          | 0.95               | 0.95               | 0.92           | 0.94   | -0.03                          | -0.03                          | -0.03                       | 7.E-05                           | -0.03                       | 6.E-05                           |
| <i>ndhB</i>  | 149          | 1.00               | 0.99               | 1.00           | 0.99   | 0.00                           | 0.00                           | 0.00                        | 2.E-01                           | 0.00                        | 3.E-02                           |
| <i>ndhB</i>  | 467          | 0.98               | 0.99               | 0.99           | 0.99   | 0.01                           | 0.00                           | 0.01                        | 1.E-02                           | 0.00                        | 2.E-01                           |
| <i>ndhB</i>  | 586          | 1.00               | 1.00               | 0.99           | 0.99   | 0.00                           | 0.00                           | 0.00                        | 4.E-01                           | 0.00                        | 3.E-01                           |
| <i>ndhB</i>  | 726          | 0.10               | 0.09               | 0.09           | 0.08   | -0.01                          | 0.00                           | -0.06                       | 6.E-01                           | -0.01                       | 9.E-01                           |
| <i>ndhB</i>  | 746          | 1.00               | 1.00               | 1.00           | 1.00   | 0.00                           | 0.00                           | 0.00                        | 4.E-01                           | 0.00                        | 4.E-01                           |
| <i>ndhB</i>  | 830          | 1.00               | 1.00               | 0.99           | 0.99   | 0.00                           | 0.00                           | 0.00                        | 6.E-02                           | 0.00                        | 7.E-01                           |
| <i>ndhB</i>  | 836          | 0.99               | 0.99               | 0.99           | 0.99   | 0.00                           | 0.00                           | 0.00                        | 9.E-01                           | 0.00                        | 8.E-01                           |
| <i>ndhB</i>  | 872          | 0.99               | 0.99               | 0.99           | 0.99   | 0.00                           | 0.00                           | 0.00                        | 7.E-01                           | 0.00                        | 9.E-01                           |
| <i>ndhB</i>  | 1255         | 1.00               | 1.00               | 1.00           | 1.00   | 0.00                           | 0.00                           | 0.00                        | 7.E-01                           | 0.00                        | 4.E-01                           |
| <i>ndhB</i>  | 1481         | 1.00               | 1.00               | 1.00           | 1.00   | 0.00                           | 0.00                           | 0.00                        | 8.E-01                           | 0.00                        | 7.E-01                           |
| <i>ndhD</i>  | 2            | 0.62               | 0.54               | 0.48           | 0.48   | -0.15                          | -0.07                          | -0.31                       | 1.E-33                           | -0.14                       | 5.E-09                           |
| <i>ndhD</i>  | 383          | 0.99               | 0.99               | 0.99           | 0.99   | 0.00                           | 0.00                           | 0.00                        | 1.E+00                           | 0.00                        | 9.E-01                           |
| <i>ndhD</i>  | 674          | 0.97               | 0.94               | 0.95           | 0.92   | -0.02                          | 0.01                           | -0.02                       | 2.E-05                           | 0.01                        | 2.E-02                           |
| <i>ndhD</i>  | 878          | 0.94               | 0.88               | 0.89           | 0.82   | -0.05                          | 0.01                           | -0.05                       | 3.E-11                           | 0.01                        | 1.E-01                           |
| <i>ndhD</i>  | 887          | 0.95               | 0.90               | 0.90           | 0.85   | -0.05                          | 0.00                           | -0.05                       | 1.E-13                           | 0.00                        | 8.E-01                           |
| <i>ndhF</i>  | 290          | 1.00               | 1.00               | 1.00           | 0.99   | 0.00                           | 0.00                           | 0.00                        | 3.E-01                           | 0.00                        | 2.E-01                           |
| <i>ndhF</i>  | 932          | 0.03               | 0.02               | 0.03           | 0.03   | 0.00                           | 0.01                           | 0.04                        | 8.E-01                           | 0.27                        | 6.E-02                           |
| <i>ndhG</i>  | 50           | 0.89               | 0.90               | 0.88           | 0.88   | -0.01                          | -0.02                          | -0.01                       | 2.E-01                           | -0.03                       | 8.E-04                           |
| <i>petL</i>  | 5            | 0.99               | 0.97               | 0.98           | 0.96   | 0.00                           | 0.01                           | 0.00                        | 8.E-01                           | 0.01                        | 3.E-01                           |
| <i>psbE</i>  | 214          | 1.00               | 1.00               | 1.00           | 1.00   | 0.00                           | 0.00                           | 0.00                        | 1.E-01                           | 0.00                        | 1.E-01                           |
| <i>psbF</i>  | 77           | 1.00               | 0.99               | 0.99           | 0.99   | -0.01                          | 0.00                           | -0.01                       | 3.E-01                           | 0.00                        | 9.E-01                           |
| <i>psbZ</i>  | 50           | 0.97               | 0.98               | 0.97           | 0.98   | 0.00                           | -0.01                          | 0.00                        | 3.E-01                           | -0.01                       | 2.E-02                           |
| <i>rpl23</i> | 89           | 0.90               | 0.95               | 0.91           | 0.92   | 0.01                           | -0.03                          | 0.01                        | 3.E-02                           | -0.04                       | 4.E-16                           |
| <i>rpoA</i>  | 200          | 0.90               | 0.93               | 0.87           | 0.94   | -0.03                          | -0.06                          | -0.03                       | 3.E-03                           | -0.07                       | 5.E-16                           |
| <i>rpoB</i>  | 338          | 0.94               | 0.92               | 0.93           | 0.93   | -0.02                          | 0.01                           | -0.02                       | 5.E-04                           | 0.01                        | 9.E-03                           |
| <i>rpoB</i>  | 551          | 0.95               | 0.93               | 0.94           | 0.94   | -0.01                          | 0.01                           | -0.01                       | 2.E-02                           | 0.01                        | 4.E-02                           |
| <i>rpoB</i>  | 2432         | 0.94               | 0.97               | 0.94           | 0.98   | 0.00                           | -0.03                          | 0.00                        | 6.E-01                           | -0.03                       | 1.E-31                           |
| <i>rpoC1</i> | 488          | 0.35               | 0.30               | 0.29           | 0.32   | -0.06                          | -0.01                          | -0.22                       | 2.E-05                           | -0.05                       | 3.E-01                           |
| <i>rps14</i> | 80           | 0.99               | 0.99               | 0.99           | 0.98   | 0.00                           | 0.00                           | 0.00                        | 9.E-01                           | 0.00                        | 7.E-01                           |
| <i>rps14</i> | 149          | 0.96               | 0.96               | 0.94           | 0.94   | -0.01                          | -0.01                          | -0.02                       | 2.E-05                           | -0.02                       | 9.E-05                           |

Supplementary Table S5 . Plastid editing extent in *ORRM3*-silenced sites

| #Gene        | Position ATG | Editing extent |            |                |        |                       |                       | $\Delta$ ORRM3sil_1 | P ( $\chi^2_{ORRM3\ sil\_1}$ ) | $\Delta$ ORRM3sil_2 | P ( $\chi^2_{ORRM3\ sil\_2}$ ) |
|--------------|--------------|----------------|------------|----------------|--------|-----------------------|-----------------------|---------------------|--------------------------------|---------------------|--------------------------------|
|              |              | ORRM3sil_1     | ORRM3sil_2 | Not inoculated | GFPsil | (Not inoc-ORRM3sil_1) | (Not inoc-ORRM3sil_2) |                     |                                |                     |                                |
| <i>accD</i>  | 794          | 1.00           | 1.00       | 0.99           | 1.00   | -0.01                 | -0.01                 | -0.01               | 2.E-03                         | -0.01               | 3.E-02                         |
| <i>accD</i>  | 1568         | 0.83           | 0.85       | 0.80           | 0.82   | -0.03                 | -0.05                 | -0.04               | 9.E-03                         | -0.07               | 6.E-06                         |
| <i>atpF</i>  | 92           | 0.99           | 0.99       | 0.99           | 0.99   | 0.00                  | -0.01                 | 0.00                | 4.E-04                         | -0.01               | 6.E-04                         |
| <i>clpP</i>  | 559          | 0.98           | 0.99       | 0.97           | 0.97   | -0.01                 | -0.02                 | -0.01               | 2.E-05                         | -0.02               | 2.E-15                         |
| <i>matK</i>  | 640          | 0.90           | 0.92       | 0.92           | 0.94   | 0.02                  | 0.00                  | 0.02                | 2.E-02                         | 0.00                | 1.E+00                         |
| <i>ndhB</i>  | 149          | 0.99           | 1.00       | 1.00           | 0.99   | 0.00                  | 0.00                  | 0.00                | 4.E-04                         | 0.00                | 3.E-01                         |
| <i>ndhB</i>  | 467          | 0.98           | 0.99       | 0.99           | 0.99   | 0.01                  | 0.00                  | 0.01                | 4.E-03                         | 0.00                | 9.E-01                         |
| <i>ndhB</i>  | 586          | 0.99           | 0.99       | 0.99           | 0.99   | 0.00                  | 0.00                  | 0.00                | 3.E-02                         | 0.00                | 8.E-01                         |
| <i>ndhB</i>  | 726          | 0.09           | 0.08       | 0.09           | 0.08   | 0.00                  | 0.01                  | -0.01               | 9.E-01                         | 0.10                | 2.E-01                         |
| <i>ndhB</i>  | 746          | 1.00           | 1.00       | 1.00           | 1.00   | 0.00                  | 0.00                  | 0.00                | 4.E-01                         | 0.00                | 7.E-01                         |
| <i>ndhB</i>  | 830          | 0.99           | 0.99       | 0.99           | 0.99   | 0.00                  | 0.00                  | 0.00                | 7.E-01                         | 0.00                | 1.E+00                         |
| <i>ndhB</i>  | 836          | 0.98           | 0.99       | 0.99           | 0.99   | 0.01                  | 0.00                  | 0.01                | 1.E-08                         | 0.00                | 4.E-01                         |
| <i>ndhB</i>  | 872          | 0.98           | 0.99       | 0.99           | 0.99   | 0.01                  | 0.00                  | 0.01                | 4.E-05                         | 0.00                | 3.E-01                         |
| <i>ndhB</i>  | 1255         | 1.00           | 1.00       | 1.00           | 1.00   | 0.00                  | 0.00                  | 0.00                | 4.E-01                         | 0.00                | 1.E-01                         |
| <i>ndhB</i>  | 1481         | 0.99           | 1.00       | 1.00           | 1.00   | 0.00                  | 0.00                  | 0.00                | 5.E-01                         | 0.00                | 5.E-01                         |
| <i>ndhD</i>  | 2            | 0.51           | 0.58       | 0.48           | 0.48   | -0.03                 | -0.10                 | -0.06               | 2.E-03                         | -0.22               | 6.E-26                         |
| <i>ndhD</i>  | 383          | 0.99           | 0.99       | 0.99           | 0.99   | 0.00                  | 0.00                  | 0.00                | 3.E-01                         | 0.00                | 3.E-01                         |
| <i>ndhD</i>  | 674          | 0.89           | 0.96       | 0.95           | 0.92   | 0.06                  | -0.01                 | 0.06                | 4.E-28                         | -0.01               | 2.E-01                         |
| <i>ndhD</i>  | 878          | 0.80           | 0.91       | 0.89           | 0.82   | 0.09                  | -0.01                 | 0.11                | 7.E-39                         | -0.01               | 3.E-02                         |
| <i>ndhD</i>  | 887          | 0.83           | 0.92       | 0.90           | 0.85   | 0.07                  | -0.02                 | 0.08                | 5.E-26                         | -0.02               | 4.E-03                         |
| <i>ndhF</i>  | 290          | 0.99           | 1.00       | 1.00           | 0.99   | 0.01                  | 0.00                  | 0.01                | 5.E-02                         | 0.00                | 2.E-01                         |
| <i>ndhF</i>  | 932          | 0.02           | 0.01       | 0.03           | 0.03   | 0.01                  | 0.02                  | 0.28                | 9.E-02                         | 0.56                | 6.E-04                         |
| <i>ndhG</i>  | 50           | 0.88           | 0.91       | 0.88           | 0.88   | 0.00                  | -0.03                 | 0.00                | 8.E-01                         | -0.03               | 3.E-03                         |
| <i>petL</i>  | 5            | 0.96           | 0.95       | 0.98           | 0.96   | 0.02                  | 0.03                  | 0.02                | 1.E-01                         | 0.03                | 3.E-02                         |
| <i>psbE</i>  | 214          | 1.00           | 1.00       | 1.00           | 1.00   | 0.00                  | 0.00                  | 0.00                | 4.E-01                         | 0.00                | 4.E-01                         |
| <i>psbF</i>  | 77           | 0.99           | 0.99       | 0.99           | 0.99   | 0.01                  | 0.00                  | 0.01                | 4.E-01                         | 0.00                | 7.E-01                         |
| <i>psbZ</i>  | 50           | 0.97           | 0.98       | 0.97           | 0.98   | 0.01                  | 0.00                  | 0.01                | 9.E-02                         | 0.00                | 5.E-01                         |
| <i>rpl23</i> | 89           | 0.91           | 0.91       | 0.91           | 0.92   | 0.01                  | 0.01                  | 0.01                | 5.E-02                         | 0.01                | 2.E-01                         |
| <i>rpoA</i>  | 200          | 0.94           | 0.94       | 0.87           | 0.94   | -0.07                 | -0.07                 | -0.08               | 4.E-19                         | -0.08               | 4.E-17                         |
| <i>rpoB</i>  | 338          | 0.95           | 0.88       | 0.93           | 0.93   | -0.03                 | 0.05                  | -0.03               | 5.E-13                         | 0.05                | 2.E-17                         |
| <i>rpoB</i>  | 551          | 0.96           | 0.90       | 0.94           | 0.94   | -0.02                 | 0.04                  | -0.02               | 3.E-06                         | 0.05                | 5.E-15                         |
| <i>rpoB</i>  | 2432         | 0.97           | 0.91       | 0.94           | 0.98   | -0.02                 | 0.03                  | -0.03               | 7.E-20                         | 0.03                | 2.E-28                         |
| <i>rpoC1</i> | 488          | 0.33           | 0.33       | 0.29           | 0.32   | -0.04                 | -0.04                 | -0.13               | 2.E-03                         | -0.13               | 4.E-03                         |
| <i>rps14</i> | 80           | 0.97           | 0.98       | 0.99           | 0.98   | 0.02                  | 0.00                  | 0.02                | 6.E-11                         | 0.00                | 2.E-01                         |
| <i>rps14</i> | 149          | 0.95           | 0.95       | 0.94           | 0.94   | -0.01                 | 0.00                  | -0.01               | 2.E-03                         | 0.00                | 2.E-01                         |

In blue shading is indicated the only site that shows a significant reduction of editing extent ( $P < 2.6 \times 10^{-5}$  and  $\Delta \geq 0.1$ ) only for one of the *ORRM3*-silenced individual (*ORRM3sil\_1*).



**Supplementary Table 6.** Effect of *RIP1* or *RIP3* mutation on sites showing a significant reduction of editing extent in *ORRM3*-silenced sites

| #Gene             | Position ATG | Editing extent |                |        |                             | $\Delta$ ORRM3sil_1 | $\Delta$ RIP1 | P ( $\chi^2_{RIP1}$ ) | $\Delta$ RIP3-1 | P ( $\chi^2_{RIP3-1}$ ) | $\Delta$ RIP3-2 | P ( $\chi^2_{RIP3-2}$ ) |
|-------------------|--------------|----------------|----------------|--------|-----------------------------|---------------------|---------------|-----------------------|-----------------|-------------------------|-----------------|-------------------------|
|                   |              | ORRM3sil_1     | Not inoculated | GFPsil | (Not inoculated-ORRM3sil_1) |                     |               |                       |                 |                         |                 |                         |
| <i>atp1</i>       | 1110         | 0.02           | 0.09           | 0.06   | 0.06                        | 0.74                | 0.96          | 2.E-105               | 0.98            | 0.E+00                  | 0.94            | 4.E-94                  |
| <i>ccmB</i>       | 75           | 0.09           | 0.15           | 0.13   | 0.06                        | 0.39                | 0.95          | 4.E-120               | 0.25            | 2.E-06                  | 0.2             | 5.E-08                  |
| <i>ccmB</i>       | 78           | 0.01           | 0.05           | 0.05   | 0.04                        | 0.72                | 0.89          | 2.E-40                | 0.14            | 2.E-01                  | 0.18            | 3.E-02                  |
| <i>ccmC</i>       | 252          | 0.25           | 0.45           | 0.41   | 0.20                        | 0.44                | 0.71          | 0.E+00                | 0.27            | 4.E-146                 | 0.06            | 9.E-03                  |
| <i>ccmC</i>       | 270          | 0.04           | 0.15           | 0.13   | 0.12                        | 0.77                | 0.76          | 4.E-125               | 0.69            | 0.E+00                  | 0.46            | 2.E-35                  |
| <i>ccmC</i>       | 381          | 0.18           | 0.32           | 0.29   | 0.14                        | 0.45                | 0.50          | 4.E-11                | 0.25            | 2.E-55                  | 0.22            | 1.E-11                  |
| <i>ccmC</i>       | 463          | 0.66           | 0.95           | 0.94   | 0.29                        | 0.30                | 0.00          | 1.E-01                | -0.01           | 5.E-02                  | 0.02            | 1.E-02                  |
| <i>ccmC</i>       | 618          | 0.46           | 0.93           | 0.89   | 0.47                        | 0.50                | 0.94          | 0.E+00                | -0.02           | 6.E-02                  | 0               | 9.E-01                  |
| <i>cob</i>        | 114          | 0.02           | 0.07           | 0.07   | 0.05                        | 0.71                | 0.75          | 3.E-39                | -2.09           | 4.E-81                  | -2.37           | 4.E-35                  |
| <i>cox2</i>       | 250          | 0.04           | 0.08           | 0.09   | 0.04                        | 0.55                | 0.82          | 7.E-48                | -0.34           | 2.E-12                  | -0.36           | 2.E-08                  |
| <i>mttb</i>       | 82           | 0.00           | 0.03           | 0.02   | 0.03                        | 0.94                | 0.64          | 1.E-04                | 0.29            | 4.E-06                  | 0.62            | 7.E-19                  |
| <i>mttb</i>       | 422          | 0.02           | 0.07           | 0.05   | 0.05                        | 0.76                | 0.94          | 7.E-41                | 0.93            | 3.E-157                 | 0.95            | 4.E-49                  |
| <i>mttb</i>       | 673          | 0.01           | 0.05           | 0.04   | 0.03                        | 0.69                | 0.73          | 5.E-07                | 0.80            | 2.E-32                  | 0.94            | 1.E-39                  |
| <i>nad1</i>       | 40           | 0.13           | 0.19           | 0.18   | 0.06                        | 0.30                | 0.56          | 8.E-13                | 0.19            | 6.E-25                  | -0.17           | 4.E-04                  |
| <i>nad4</i>       | 261          | 0.01           | 0.03           | 0.04   | 0.02                        | 0.74                | 0.43          | 2.E-01                | 0.90            | 4.E-171                 | 0.95            | 2.E-135                 |
| <i>nad4</i>       | 636          | 0.03           | 0.10           | 0.10   | 0.07                        | 0.71                | 0.82          | 1.E-33                | -0.31           | 4.E-13                  | -0.65           | 2.E-08                  |
| <i>nad4</i>       | 1131         | 0.04           | 0.12           | 0.10   | 0.08                        | 0.69                | 0.82          | 9.E-35                | -0.07           | 5.E-02                  | -0.28           | 3.E-09                  |
| <i>nad4</i>       | 1194         | 0.06           | 0.14           | 0.11   | 0.08                        | 0.54                | 0.85          | 4.E-75                | 0.88            | 4.E-260                 | 0.84            | 1.E-58                  |
| <i>nad5</i>       | 609          | 0.79           | 0.87           | 0.90   | 0.08                        | 0.10                | 0.88          | 2.E-180               | 0.62            | 0.E+00                  | 0.56            | 0.E+00                  |
| <i>nad5</i>       | 1665         | 0.05           | 0.12           | 0.11   | 0.07                        | 0.58                | 0.35          | 6.E-06                | 0.16            | 1.E-11                  | 0.18            | 4.E-04                  |
| <i>nad5</i>       | 1929         | 0.03           | 0.08           | 0.08   | 0.05                        | 0.59                | 0.75          | 2.E-10                | -0.12           | 2.E-05                  | 0.36            | 1.E-07                  |
| <i>nad5</i>       | 1933         | 0.01           | 0.03           | 0.02   | 0.02                        | 0.61                | 0.78          | 6.E-07                | -0.10           | 7.E-02                  | 0.53            | 8.E-11                  |
| <i>nad5intron</i> | 141966       | 0.10           | 0.40           | 0.36   | 0.30                        | 0.76                | 0.91          | 1.E-250               | -0.12           | 5.E-48                  | 0.03            | 4.E-01                  |
| <i>nad6leader</i> | -73          | 0.54           | 0.87           | 0.85   | 0.33                        | 0.38                | 0.84          | 0.E+00                | 0.04            | 1.E-132                 | 0.02            | 2.E-02                  |
| <i>nad7</i>       | 789          | 0.19           | 0.25           | 0.27   | 0.06                        | 0.23                | 0.07          | 3.E-02                | -0.13           | 9.E-08                  | 0.15            | 4.E-08                  |
| <i>nad7</i>       | 1050         | 0.09           | 0.17           | 0.18   | 0.08                        | 0.45                | -0.66         | 2.E-37                | -0.10           | 1.E-05                  | -0.07           | 1.E-02                  |
| <i>nad9</i>       | 517          | 0.03           | 0.05           | 0.05   | 0.02                        | 0.46                | 0.95          | 0.E+00                | 0.16            | 7.E-09                  | 0.22            | 4.E-08                  |
| <i>orf114</i>     | 327          | 0.36           | 0.65           | 0.66   | 0.29                        | 0.45                | 0.72          | 2.E-262               | 0.85            | 0.E+00                  | 0.84            | 0.E+00                  |
| <i>orf240A</i>    | 199          | 0.21           | 0.43           | 0.48   | 0.22                        | 0.51                | -0.85         | 9.E-268               | -0.39           | 8.E-241                 | -0.09           | 1.E-02                  |
| <i>rps12</i>      | 328          | 0.01           | 0.04           | 0.04   | 0.03                        | 0.75                | 0.93          | 6.E-18                | 0.00            | 1.E+00                  | -0.37           | 4.E-05                  |
| <i>rps3</i>       | 1344         | 0.08           | 0.45           | 0.42   | 0.37                        | 0.83                | 0.98          | 0.E+00                | 0.98            | 0.E+00                  | 0.98            | 0.E+00                  |
| <i>rps4</i>       | 77           | 0.59           | 0.78           | 0.79   | 0.19                        | 0.24                | 0.97          | 0.E+00                | 0.83            | 0.E+00                  | 0.8             | 0.E+00                  |

Sites showing a significant reduction of editing extent in *rip1* and *rip3* mutants are shown in a blue background (data from Bentolila et al., 2013). Two independent *rip3* insertional mutants were assessed; only sites showing reduction in both mutants are highlighted.
